# Supplementary material
Source: publisher figshare collection journal article supplement (https://gsapubs.figshare.com/articles/dataset/_/14292323)
Supplement: Supplementary file 1 [file 3]

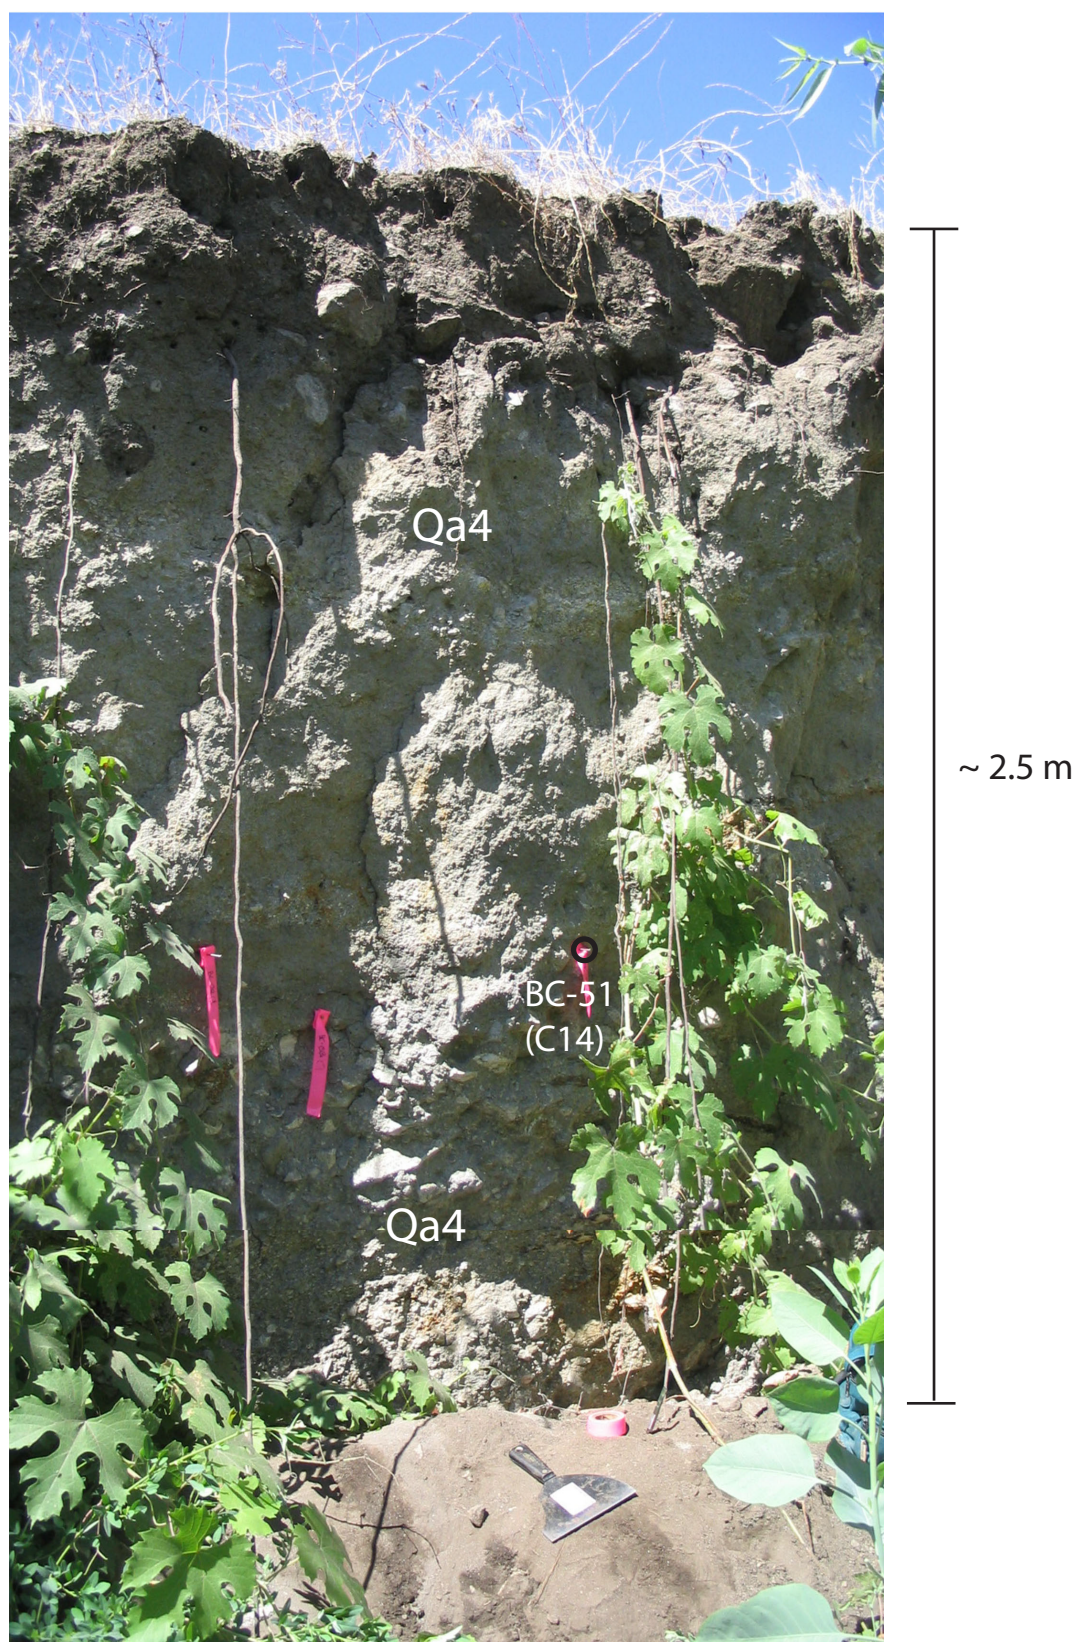

Figure S5: Photomosaic showing the location of dated radiocarbon sample BC-51 in a natural exposure of Qa4. See Figure 3 for location of sample in map-view. View to west.
