# Supplementary material
Source: publisher figshare collection journal article supplement (https://gsapubs.figshare.com/articles/dataset/_/14292323)
Supplement: Supplementary file 2 [file 3]

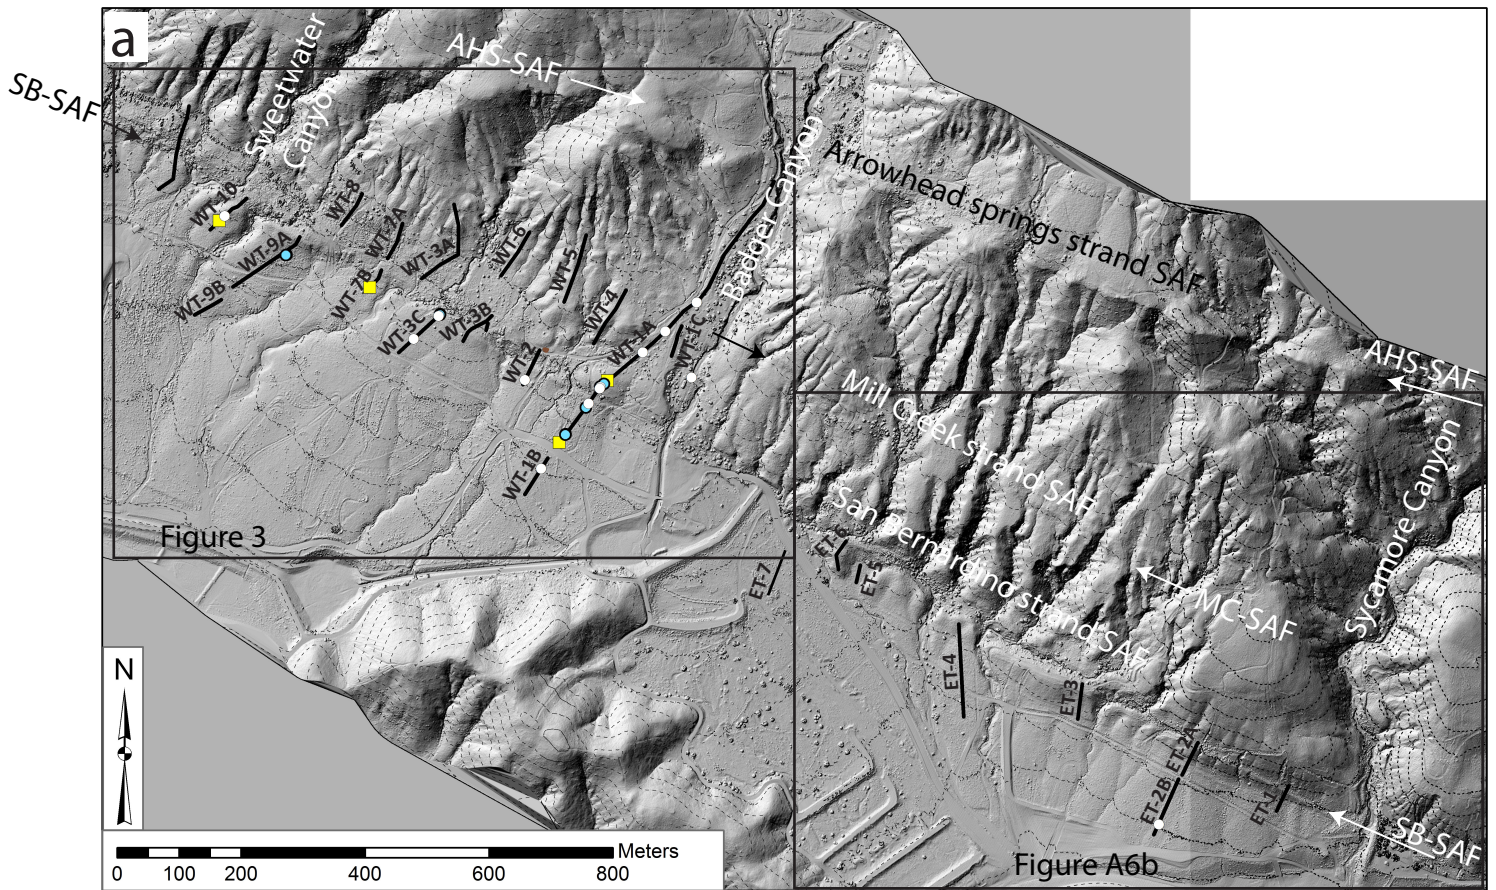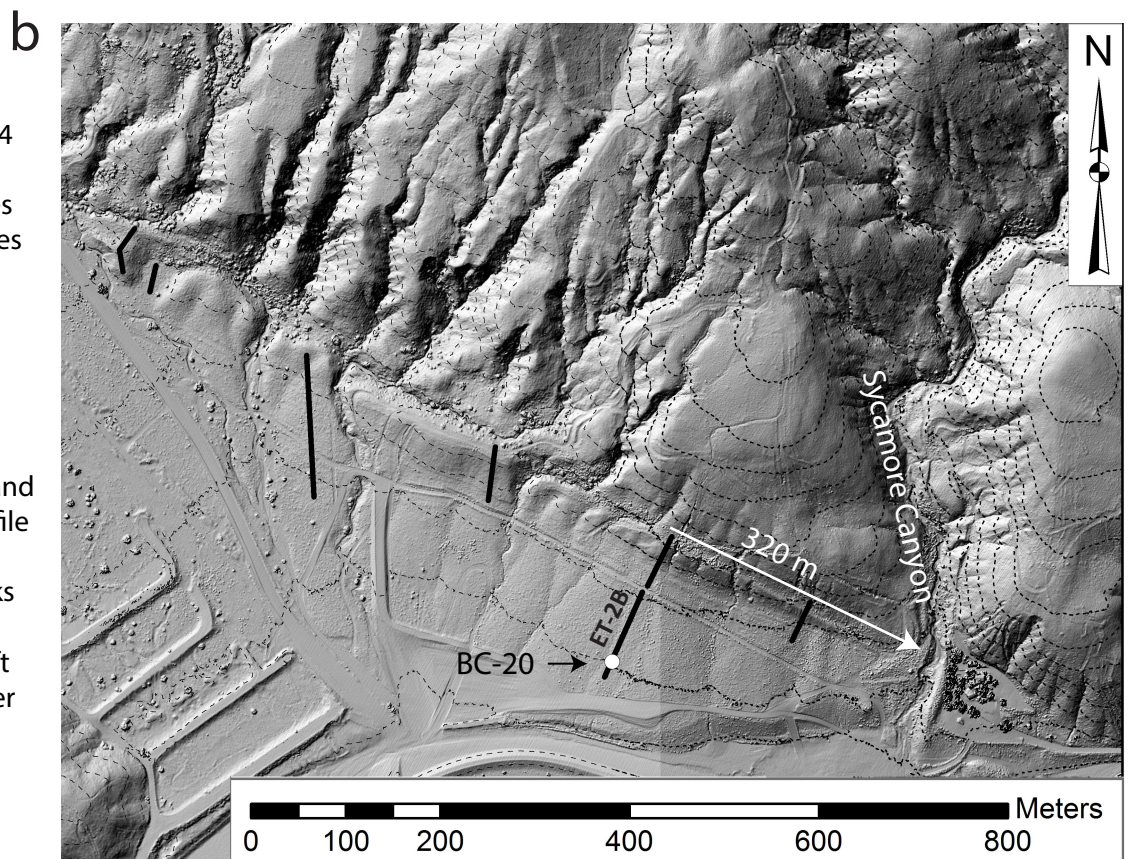

Figure S6. LiDAR imagery (0.5-m resolution) from the B4 project (Bevis et al., 2005) showing locations of trenches and geochronological samples in the vicinity of Badger Canyon. White circles mark radiocarbon samples, blue circles mark OSL dating samples, red circles mark cosmogenic nuclide ( $^{10}\text{Be}$ ) samples from boulder tops, and yellow squares mark soil profile descriptions. Black boxes in lower right corner of (a) marks location of part (b) of this figure. Black box in upper left corner of (a) marks the Badger Canyon study area and the location of the geologic map shown in Figure 3.
