# Supplementary material
Source: publisher figshare collection journal article supplement (https://gsapubs.figshare.com/articles/dataset/_/14292323)
Supplement: Supplementary file 3 [file 3]

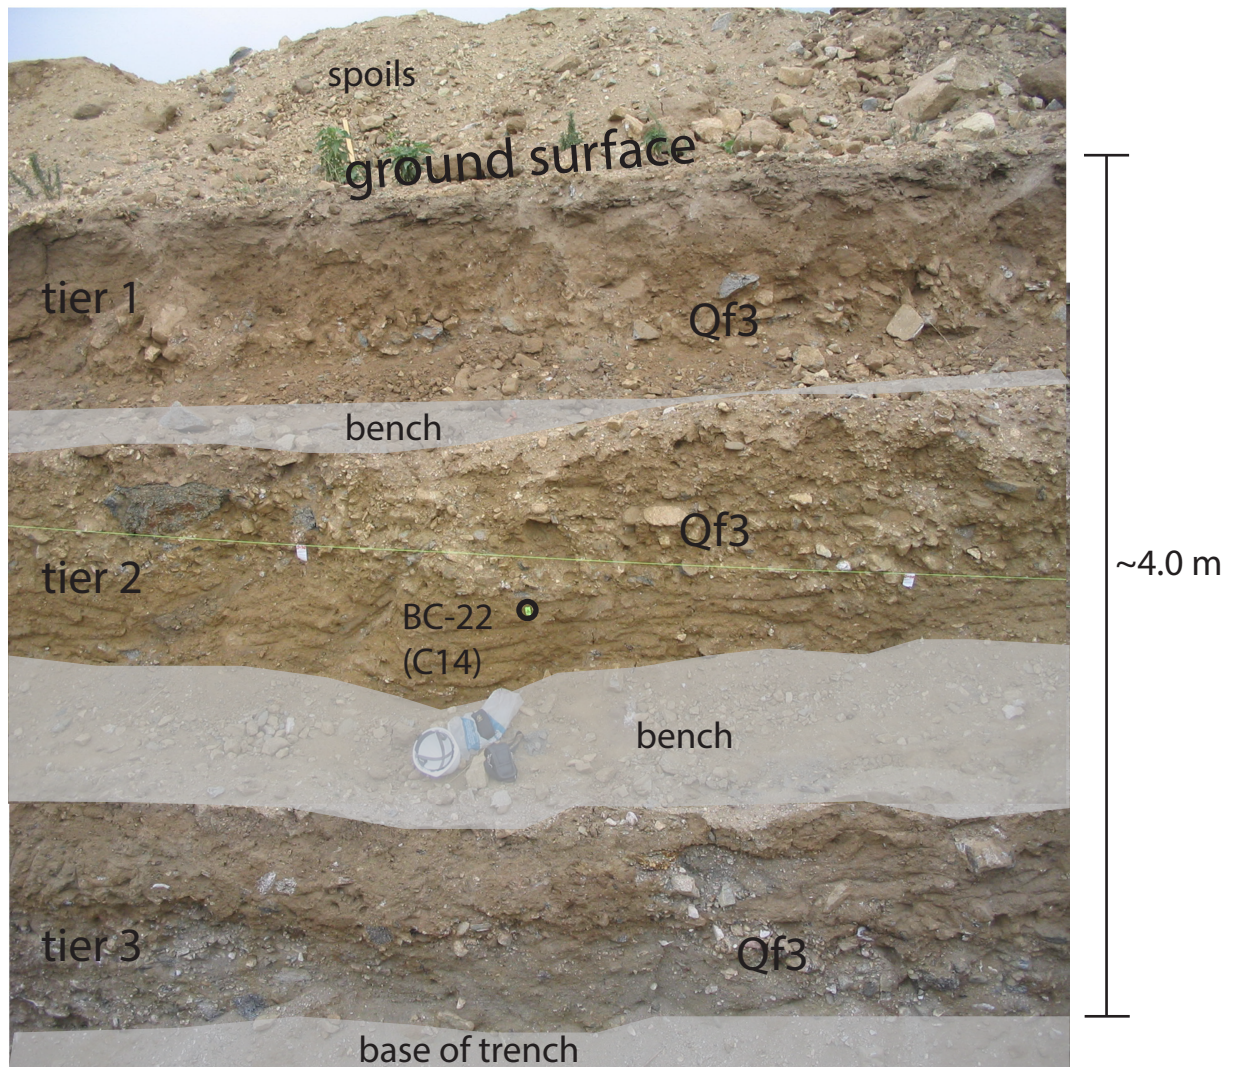

Figure S4: Photomosaic showing the location of dated radiocarbon sample BC-22 from Qf3 in the west wall of trench WT-1B, near the northern end of the trench. See Figure 3 for location of sample in map-view.
