# Supplementary material
Source: publisher figshare collection journal article supplement (https://gsapubs.figshare.com/articles/dataset/_/14292323)
Supplement: Supplementary file 4 [file 3]

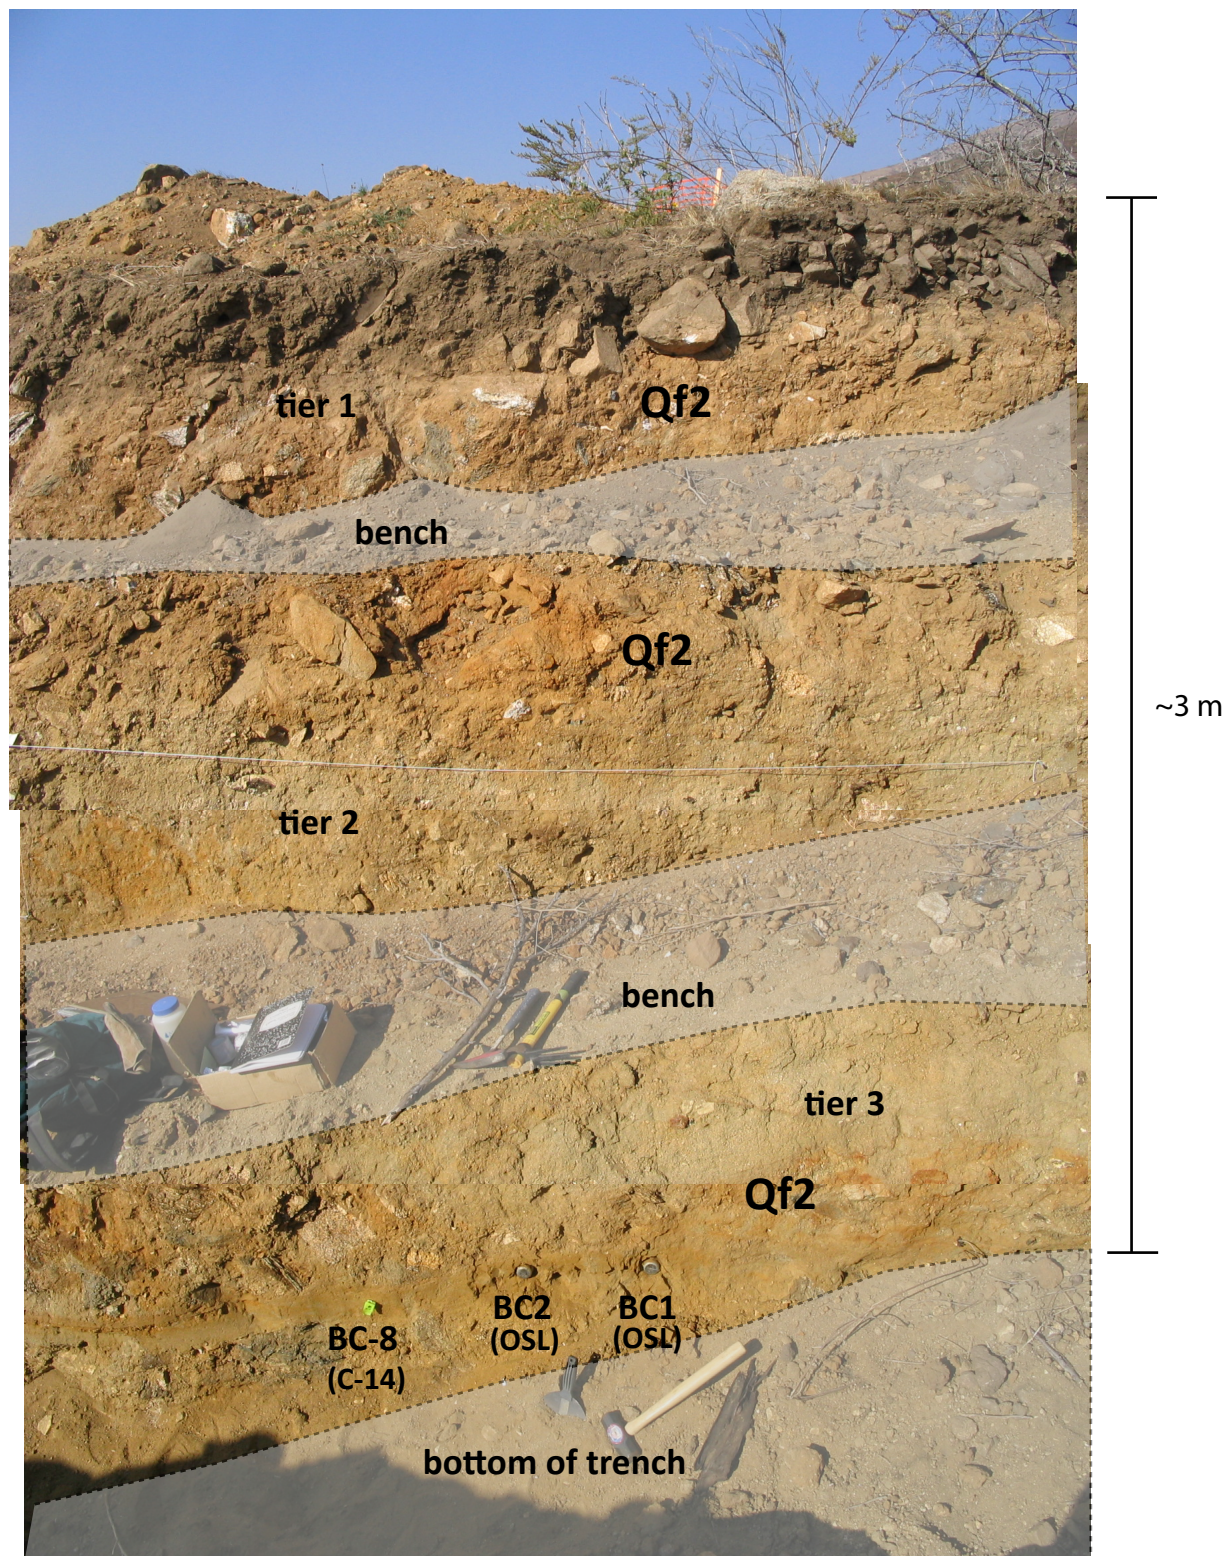

Figure S3: Photomosaic of the northern end of trench WT-3C, showing the locations of dated luminescence sample BC2 and dated radiocarbon sample BC-8 from a ~10-cm-thick sand layer within Qf2. Luminescence sample BC1 could not be dated. View to west. See Figure 3 for locations of these samples in map-view.
