# Supplementary material
Source: publisher figshare collection journal article supplement (https://gsapubs.figshare.com/articles/dataset/_/14292323)
Supplement: Supplementary file 5 [file 3]

SW

NE

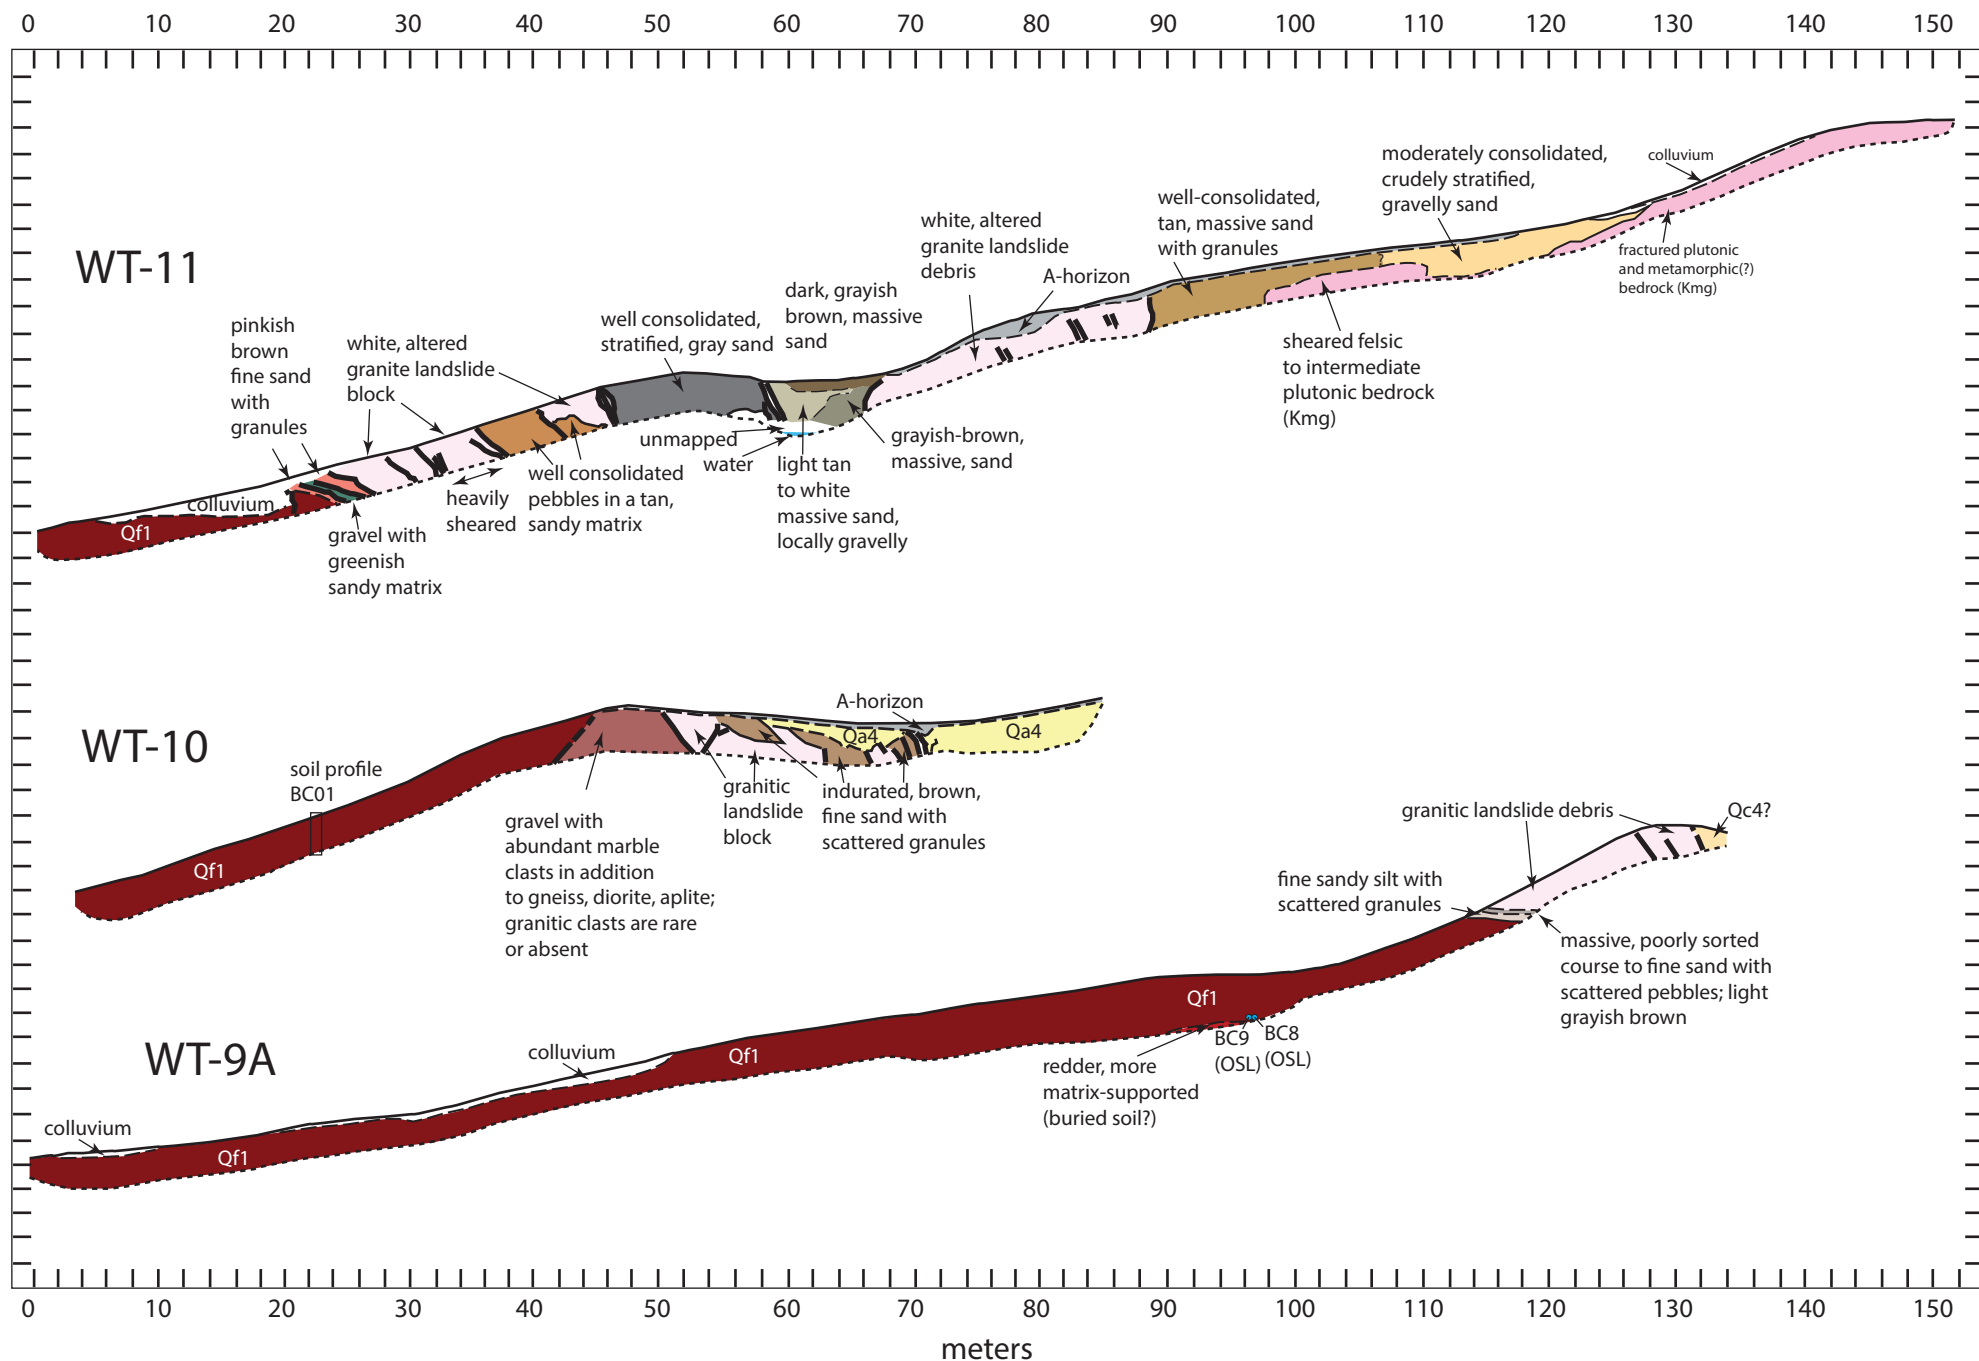

Figure S1: Logs of trenches WT-9A, WT-10 and WT-11, showing exposures of Qf1, location of OSL samples BC-8 and BC-9 in WT-9A and location of soil profile BC01 in WT-10. Modified from unpublished report by McKeown (2006). See Figure 3 legend for description of units not described on the figure itself
