# Supplementary material
Source: publisher figshare collection journal article supplement (https://gsapubs.figshare.com/articles/dataset/_/14292323)
Supplement: Supplementary file 6 [file 3]

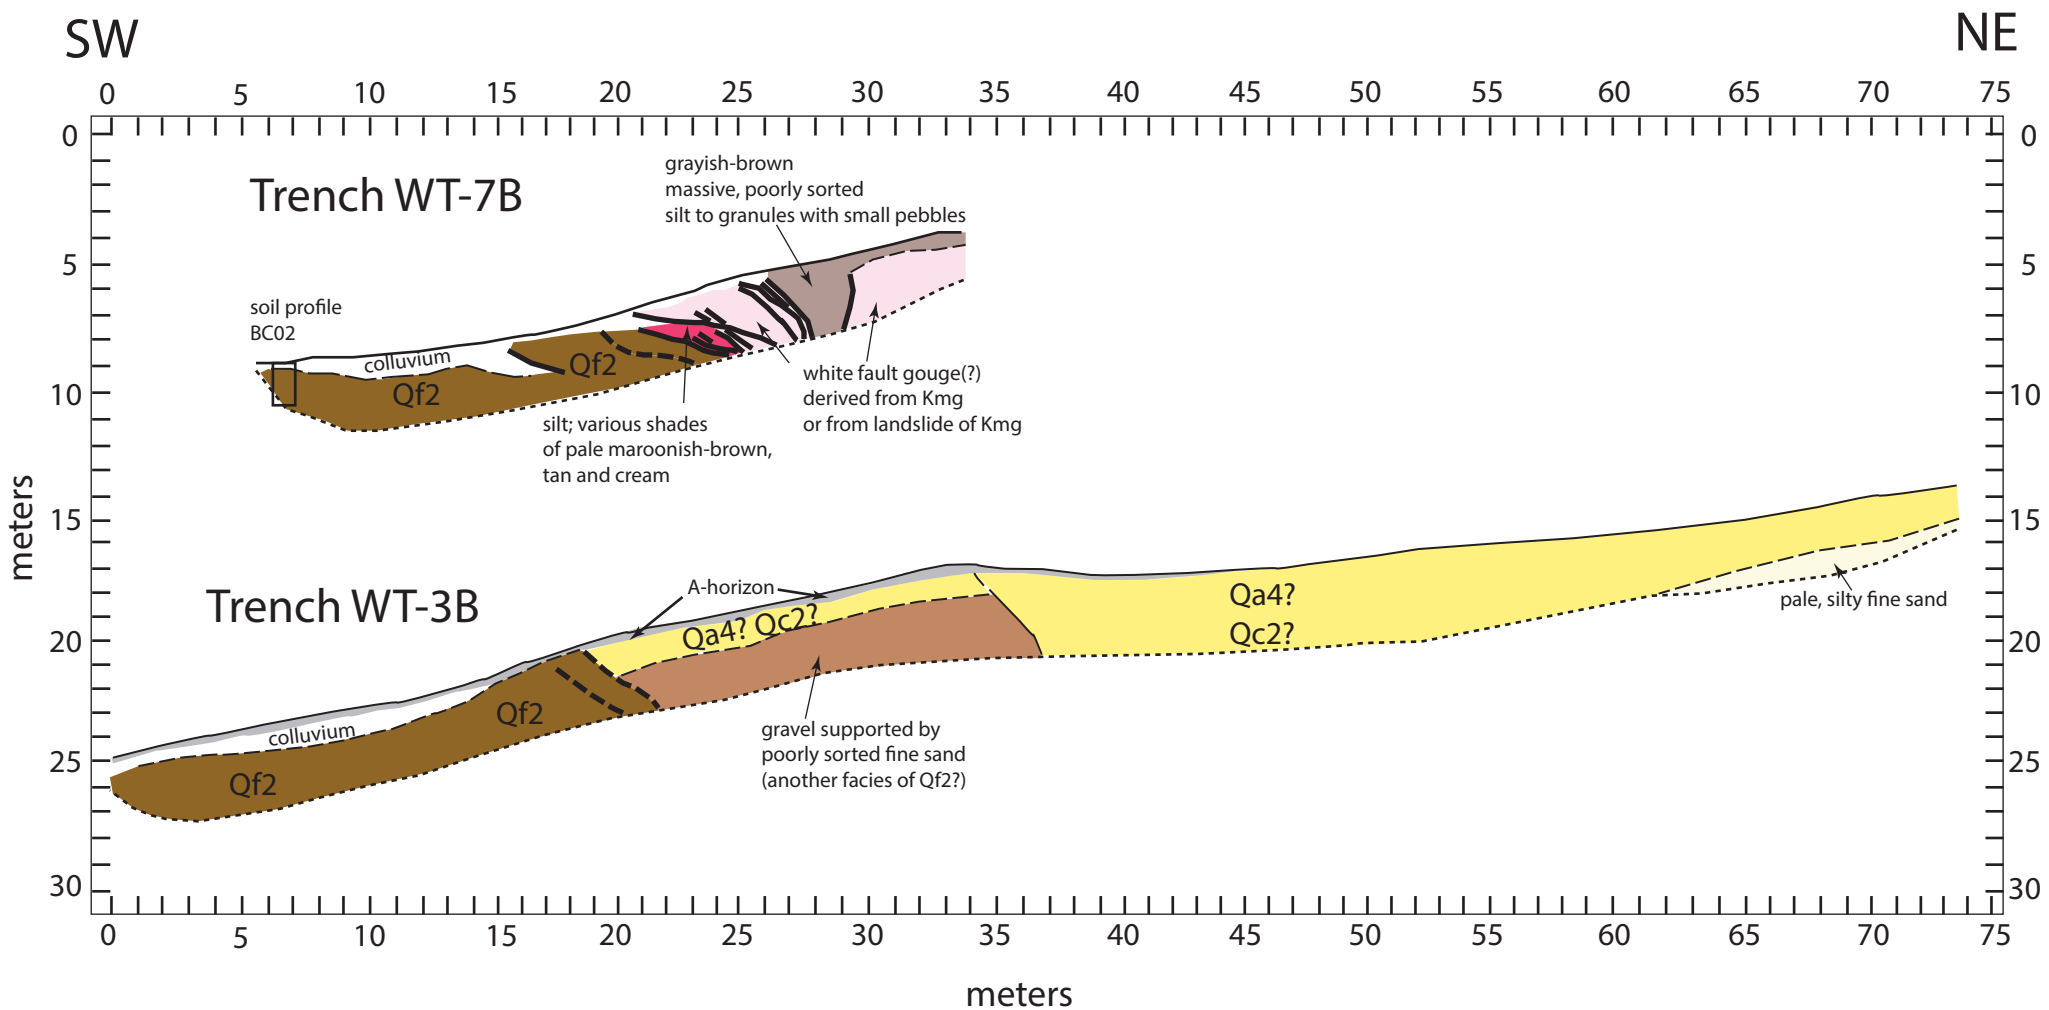

Figure S2: Logs of trenches WT-7B and WT-3B showing exposures of Qf2 and location of soil profile BC02. See Figure 3 legend for description of units not described on the figure itself. Modified from unpublished report by J. McKeown (2006).
